# Supplementary material for: Knowledge Mapping of liver metastases from colonrectal cazncer: A bibliometric analysis (2018–2024) and reflections
Source: Research Square preprint supplement (doi:10.21203/rs.3.rs-6792171/v1), 2025-06-23
Supplement: Supplementary file 1 [file f169abf5014da17040c6780f.docx]

**Table S1**.Top 20 Cited References.

| Rank | cited reference | citations | total link strength |
| --- | --- | --- | --- |
| 1 | fong y, 1999, ann surg, v230, p309, doi 10.1097/00000658-199909000-00004 | 742 | 8225 |
| 2 | jemal a, 2011, ca-cancer j clin, v61, p134, doi [10.3322/caac.21492 10.3322/caac.20115 10.3322/caac.20107] | 739 | 3953 |
| 3 | van cutsem e, 2016, ann oncol, v27, p1386, doi 10.1093/annonc/mdw235 | 660 | 6812 |
| 4 | nordlinger b, 2013, lancet oncol, v14, p1208, doi 10.1016/s1470-2045(13)70447-9 | 515 | 6407 |
| 5 | manfredi s, 2006, ann surg, v244, p254, doi 10.1097/01.sla.0000217629.94941.cf | 448 | 3732 |
| 6 | sung h, 2021, ca-cancer j clin, v71, p209, doi 10.3322/caac.21660 | 429 | 2140 |
| 7 | dindo d, 2004, ann surg, v240, p205, doi 10.1097/01.sla.0000133083.54934.ae | 383 | 2547 |
| 8 | engstrand j, 2018, bmc cancer, v18, doi 10.1186/s12885-017-3925-x | 372 | 2964 |
| 9 | nordlinger b, 2008, lancet, v371, p1007, doi 10.1016/s0140-6736(08)60455-9 | 350 | 4877 |
| 10 | eisenhauer ea, 2009, eur j cancer, v45, p228, doi 10.1016/j.ejca.2008.10.026 | 342 | 2353 |
| 11 | tomlinson js, 2007, j clin oncol, v25, p4575, doi 10.1200/jco.2007.11.0833 | 327 | 3177 |
| 12 | kopetz s, 2009, j clin oncol, v27, p3677, doi 10.1200/jco.2008.20.5278 | 305 | 3213 |
| 13 | adam r, 2015, cancer treat rev, v41, p729, doi 10.1016/j.ctrv.2015.06.006 | 267 | 3167 |
| 14 | siegel rl, 2017, ca-cancer j clin, v67, p7, doi [10.3322/caac.21772 10.3322/caac.21387 10.3322/caac.21669] | 265 | 1554 |
| 15 | abdalla ek, 2004, ann surg, v239, p818, doi 10.1097/01.sla.0000128305.90650.71 | 264 | 2972 |
| 16 | kanas gena p, 2012, clin epidemiol, v4, p283, doi 10.2147/clep.s34285 | 255 | 2834 |
| 17 | rees m, 2008, ann surg, v247, p125, doi 10.1097/sla.0b013e31815aa2c2 | 243 | 2553 |
| 18 | nordlinger b, 1996, cancer, v77, p1254, doi 10.1002/(sici)1097-0142(19960401)77:7<1254::aid-cncr5>3.0.co;2-i | 238 | 3195 |
| 19 | de jong mc, 2009, ann surg, v250, p440, doi 10.1097/sla.0b013e3181b4539b | 232 | 2585 |
| 20 | adam r, 2004, ann surg, v240, p644, doi 10.1097/01.sla.0000141198.92114.16 | 219 | 2833 |
